# Supplementary material
Source: publisher site journal article supplement (http://kjim.org/upload/media/kjim-2021-088-suppl1.pdf)
Supplement: Supplementary file 1 [file kjim-2021-088-suppl1.pdf]

**Supplementary Table 1. Criteria for LVAD implantation in Korea**

|                   |                                                                                                                                                                                                                                                                                                                                                                                                                                                                                                                                                                                                                                                                                                                                                                                                                                                                                                                                                                                                                        |
|-------------------|------------------------------------------------------------------------------------------------------------------------------------------------------------------------------------------------------------------------------------------------------------------------------------------------------------------------------------------------------------------------------------------------------------------------------------------------------------------------------------------------------------------------------------------------------------------------------------------------------------------------------------------------------------------------------------------------------------------------------------------------------------------------------------------------------------------------------------------------------------------------------------------------------------------------------------------------------------------------------------------------------------------------|
| Indications       | <ol style="list-style-type: none"> <li>1. Bridge to transplantation (BTT) in end-stage heart failure patient registered as a heart transplantation candidate</li> <li>2. End-stage heart failure patient ineligible for heart transplantation and has severe symptoms &gt; 2 months despite medication including beta blockers or mechanical circulatory devices such as IABP and ECMO, and fulfills one or more of the following:               <ol style="list-style-type: none"> <li>a. LVEF &lt; 25% or equivalent evidence of ventricular dysfunction with peak <math>VO_2</math> &lt; 12 mL/kg/min (14 mL/kg/min in case of beta blocker intolerance) or an equivalent exercise test result</li> <li>b. Unable to discontinue intravenous inotropes</li> <li>c. Progressive renal or hepatic dysfunction caused by heart failure (PCWP <math>\geq</math> 20 mmHg and either systolic blood pressure <math>\leq</math> 90 mmHg or cardiac index <math>\leq</math> 2.0 L/min/m<sup>2</sup>)</li> </ol> </li> </ol> |
| Contraindications | <p>Contraindications for each case are debated by the official expert panels.</p> <ol style="list-style-type: none"> <li>1. End-stage renal disease receiving permanent dialysis therapy</li> <li>2. Irreversible organ dysfunction of the kidneys, liver, or lung</li> <li>3. Severe brain damage</li> <li>4. Sepsis</li> <li>5. Contraindication to long-term anticoagulation</li> <li>6. Comorbidity limiting life expectancy such as advanced cancer</li> </ol>                                                                                                                                                                                                                                                                                                                                                                                                                                                                                                                                                    |

LVAD, left ventricular assist device; IABP, intra-aortic balloon pump; ECMO, extracorporeal membrane oxygenation; LVEF, left ventricular ejection fraction;  $VO_2$ , oxygen consumption; PCWP, pulmonary capillary wedge pressure.
